# Supplementary material
Source: publisher figshare collection journal article supplement (https://frontiersin.figshare.com/ndownloader/files/31085782)
Supplement: Supplementary file [file 31085782]

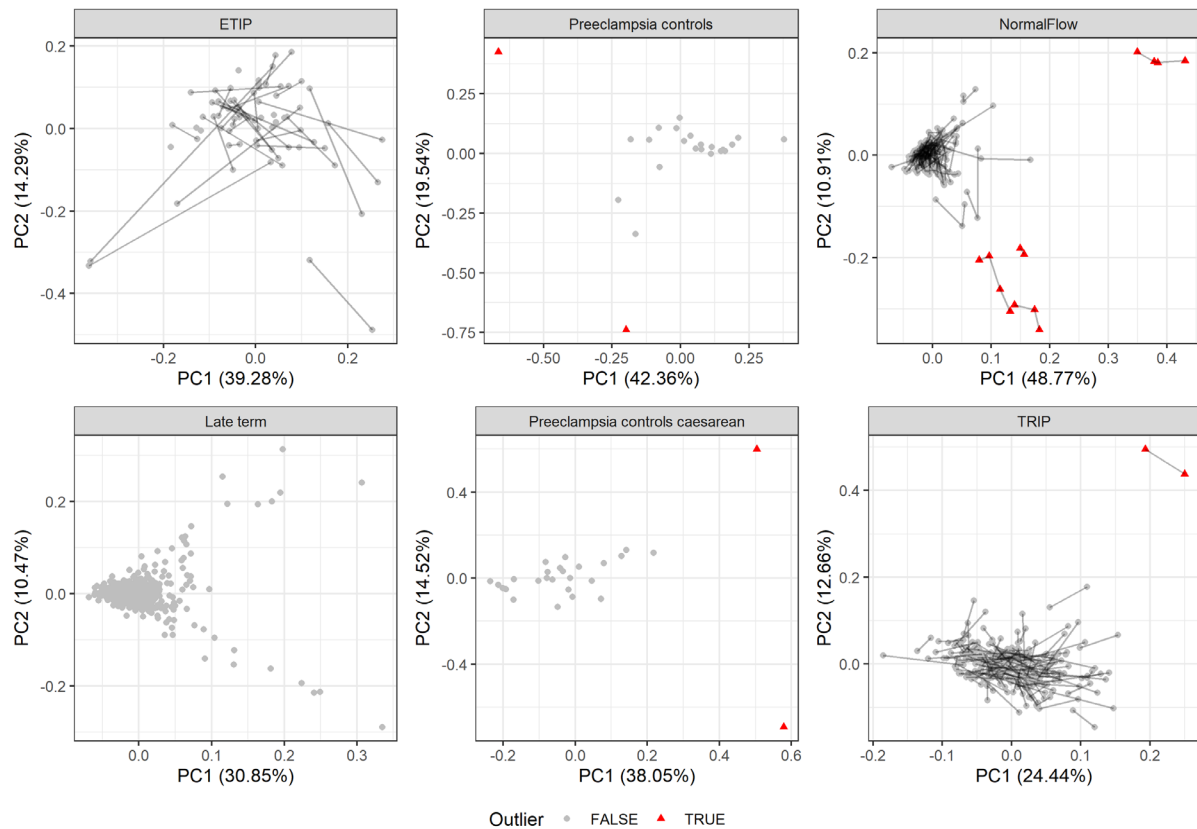

**Supplementary Figure 2. Detection of outliers.** Principal component analysis (PCA) was performed by original cohort and inspected for outliers. Outlying samples are indicated as red triangles. Black lines connect samples from the same individual. Abbreviations: PC, principal component. ETIP, Exercise Training in Pregnancy for obese women. TRIP, Training in pregnancy.
